# Supplementary material for: Effects of processing conditions on stability of immune analytes in human blood
Source: PubMed Central journal article supplement (PMC7566484; doi:10.1038/s41598-020-74274-8), 2020-10-15
Supplement: 41598_2020_74274_MOESM1_ESM.pdf [file 41598_2020_74274_MOESM1_ESM.pdf]

**TITLE: Effects of processing conditions on stability of immune analytes in human blood**

**Short Title:** Blood processing delay effects on immune analytes

**Authors:** Andres Gottfried-Blackmore, MD PhD<sup>1#\*</sup>; Samuel J.S. Rubin, PhD<sup>2#</sup>; Lawrence Bai, BS<sup>2#</sup>; Sheun Aluko, BS<sup>3</sup>, Yujun Yang, MD<sup>1</sup>; Walter Park<sup>1</sup>, MD; Aida Habtezion, MD MSc<sup>1\*</sup>.

Institution: 1. Division of Gastroenterology and Hepatology, Department of Medicine, Stanford University School of Medicine, Alway Building M211, 300 Pasteur Drive, Stanford, CA, 94305, USA. 2. Immunology Program, Stanford University School of Medicine, 1215 Welch Road, Modular B, Stanford, CA, 94305, USA. 3. Biomedical Informatics, Stanford University School of Medicine, 291 Campus Drive, Li Ka Shing Building, Stanford, CA 94305

\*Corresponding Authors:

Andres Gottfried-Blackmore (ORCID 0000-0002-3563-3727) & Aida Habtezion (ORCID 0000-0002-4473-006X)

300 Pasteur Dr. Alway Bld. M211, Stanford, CA 94062, USA

Email: andresg@stanford.edu; aidah@stanford.edu

Fax. 01-650-723-5488; Tel.01-650-7235512

# equal contribution.

**Abbreviations:**

PBMC: peripheral blood mononuclear cells; RT: room temperature

## **Supplemental Methods:**

### *Preparation and Storage of Serum, Plasma, and Peripheral Blood Mononuclear Cell*

*suspensions:* At baseline or after the specified processing delays serum vacutainer tubes were centrifuged at 1200 rcf for 10 minutes at room temperature; serum supernatant was aliquoted and frozen at -80°C. Plasma was generated by centrifugation of sodium heparin vacutainer tubes at 800 rcf for 10 minutes at room temperature; plasma supernatant was aliquoted with care not to pipette any cells and frozen at -80°C. The remaining blood in the plasma tubes was then diluted 1:1 with PBS without calcium or magnesium, overlaid onto 15 mL of Ficoll-Paque (GE Healthcare, cat. #17-1440-03) in Accuspin tubes (Sigma-Aldrich, cat. #A2055), and centrifuged at 800 rcf for 20 minutes at room temperature with acceleration at five and break at zero. The buffy coat PBMC layer was collected and washed twice in 50 mL PBS by centrifugation at 800 rcf for 10 minutes at RT. PBMCs were resuspended in Recovery Cell Culture Freezing Medium (Thermo Fisher Scientific, cat. #12648010) at 5-10x10<sup>6</sup> cells/ 1 mL and frozen according to manufacturer instructions (Bel-Art Products, cat. #F18844-0000), and then stored in liquid nitrogen.

### *Mass Cytometry (CyTOF) cell preparation and labeling*

Briefly, PBMCs were thawed in warm media (RPMI containing 10% FCS and 1% penicillin/streptomycin) with benzonase (25 U/ml), washed twice in media with benzonase, washed once in media without benzonase, and 1 million cells were rested in media without benzonase in a 96-well deep well plate for 2-3 h at 37°C before stimulation with PMA (10ng/ml), ionomycin (1µg/ml), and LPS (1µg/ml) in the presence of brefeldin A (5µg/ml) and monensin (5µg/ml) for 4 h. An unstimulated control sample was prepared for each subject/condition and treated the same as stimulated samples, except for addition of stimulants. Anti-CD107a and – CD154 antibodies (2µg/ml) were added during stimulation according to referenced methods.

EDTA was added (2mM) for 15 min at room temperature, before washing twice with CyFACS buffer (CyPBS (Rockland) containing BSA (0.1%), EDTA (2mM) and sodium azide (0.05%)). Cells were incubated with a 70µL cocktail of antibodies against cell surface antigens (Supplemental Table 1) in CyFACS buffer for 45 min on ice, washed twice with CyFACS buffer and resuspended in CyPBS (100µL) containing of 1:3000 maleimide-DOTA and 115-Indium for 30 min on ice. Cells were washed thrice in CyFACS buffer, resuspended in CyPBS (100µL) containing 2% PFA and incubated overnight at 4°C. After washing in 1X permeabilization buffer (eBioscience), cells were incubated with a 70µL cocktail of antibodies against intracellular antigens (Supplemental Table 1) in CyFACS buffer for 45 min on ice. After washing thrice in CyFACS buffer, cells were incubated in CyPBS (100µL) containing 1:2000 Ir-Intercalator and PFA (2%) for 20 min at RT, washed twice in CyFACS followed by milliQ water thrice, spiked with beads according to the manufacturer's instructions, and resuspended in 1-1.5mL milliQ water for analysis on a Helios instrument. Approximately 300,000 events or all possible events (whichever lower) were acquired for each sample. Bead normalized files were obtained from the Helios instrument using on-board software.

### *Immune-analyte Variance Estimation Tool (iVET) web application*

#### **Overview**

The iVET web application was created using the Google application development software suite known as *Firebase* (<https://firebase.google.com/>), which provides all necessary components for building a modern cloud hosted website that is accessible anywhere in the world.

The software architecture consists of 2 main components:

1. A cloud hosted database called *Firestore*, which stores all of the immuno-analyte data.
2. The website interface which was programmed using the React javascript framework, developed by Facebook for programming websites (<https://reactjs.org/>).

When a user visits the iVET website URL, the website code is delivered to their web browser in order to run the iVET application. When the user searches for an analyte of interest, iVET queries the *Firestore* database over the internet in order to retrieve the specific immune analyte data requested, and then graphs the data.

### **Cloud Database and Data Format**

The immune analyte data is stored in a cloud hosted database called *Firestore*. *Firestore* is a *document* database as opposed to a relational (SQL, or server query language) database, with the main difference being that a document database has a flexible and updateable schema (data model), while a SQL database has a fixed data model (<https://aws.amazon.com/nosql/document/>). In a document database, the data is partitioned into *collections*, each of which consists of an arbitrarily large number of *documents*. Each document is a *key-value* store, which is a data structure that maps specific keys to their corresponding values. For the purposes of iVET, each *collection* corresponds to a separate assay and/or sub condition for that assay. For example, “stimulated CyTOF”, “unstimulated CyTOF” and “microarray” are collections. Each collection contains several “documents”, where each document holds all of the data for a specific analyte within that collection. For example, within the “plasma cytokines” collection, the document “IL1A” houses all of the IL1A measurements for all 10 patients across all time and temperature conditions. The key value format of each document is consistent across all collections. Namely, the keys consist of the the patient and time/temperature identifier (for example, “HBP01-1”, which identifies patient 1 and time/temperature condition 1). The corresponding value is the numeric quantity associated with that patient, at that condition, for the immune analyte that corresponds to the document.

### **Website Interface**

The iVET interface was created using the React Javascript Framework. Specifically, the *create-react-app* (<https://github.com/facebook/create-react-app>) command line tool was used to

initiate the project source code, and this base code was heavily modified and adapted to create the desired interface.

The interface consists of 3 main components:

- a. Assay selection dropdown
- b. Analyte search box
- c. Data format selector
- d. Box plot data visualization

React javascript serves as the backbone programming paradigm for the web application. However, in modern web development a “component library” is often chosen for styling applications and for providing modular functionality, such as search bars, dropdown menus, etc. iVET utilizes the *semantic-ui* component library (<https://react.semantic-ui.com/>) for components a, b, and c above. The lists of selectable analytes for each assay is stored within the iVET interface. Thus, when a user selects a specific assay using the dropdown menu, the search bar component is limited to only display candidate results from that assay. This programmability is achieved using javascript. When a user selects a particular assay and analyte (IL1A, for example), the corresponding *document* is retrieved from the database using a javascript HTTP request and the raw values are graphed directly by iVET. Specifically, all of the values across 10 patients for time/temperature condition 1 are pooled together to produce the first box plot. A similar process is performed to produce the remaining 4 box plots corresponding to the other 4 time/temperature conditions. The only mathematical computation coded in the iVET application is the calculation of the percentage change. This is done by repeating the following calculation for *each* patient: for  $N=2..4$ , we calculate  $((\text{the patient's value for the assay at time/temperature condition } N) - \text{the patient's baseline value}) / (\text{the patient's baseline value})$ , where *baseline value* is simply the value for the assay at time/temperature condition 1. After this calculation is performed, iVET displays these percentage changes pooled together across patients for each  $N$ , producing the  $N$  box plots. Both the raw values and the percent change values are sent to

the graphs; however, only one is plotted at a time. When the user toggles the data format to percent change or raw values, a message is sent to the box plot to update the graph to show the desired format.

The box plots are created using the open source web plotting library *Plotly* (<https://plotly.com/javascript/>), which was integrated into iVET. Once the data values are retrieved as described above, they are passed to the graphing library as 5 separate arrays, where each array represents a time/temperature condition, and the values in each array correspond to the immune anayte values for each patient for that condition. *Plotly* automatically plots median, minimum, maximum, and quartile values based on the input data.

### **Supplemental Figures:**

Supplemental Figure 1. **Prolonged time delay has minimal impact on RNA yield and RIN values.** Bar graphs showing (A) RNA concentration, (B) % of samples with  $RIN \geq 8$ , and (C) the RNA QC metric based on microarray gene expression profiles of positive vs negative AUC values. The pos vs neg AUC for HBP04-5 and HBP09-5 were evaluated as low and further excluded from the study (see Methods).

Supplemental Figure 2. **PCA analysis does not reveal any separation by variance across independent demographic variables such as age, sex, race, and individual subjects.** PC analysis of samples containing all conditions, colored by (A) age; (B) sex; (C) race; and (D) individual subject.

Supplemental Figure 3. **Plasma and serum cytokine levels are poorly correlated.** Heatmap showing Pearson correlation coefficients between serum and plasma cytokine levels (log<sub>2</sub> MFI), ranked at baseline, and shown for all four processing delay conditions. (\* =  $p < 0.05$ ; repeated-measures Two-Way ANOVA Bonferroni posthoc test for multiple comparisons).

Supplemental Figure 4. **Processing delay exerts relatively greater changes in circulating cytokines as a function of group median.** Heatmaps showing % change in 62 cytokines from median group values at baseline. (A) Serum and (B) plasma cytokines grouped by putative functional groups and ranked by abundance in blood for each subgroup. (C) PCA plots showing effect of temperature (color code) and time (circle size) for each individual on aggregate cytokine variation in serum and plasma. (\* =  $p < 0.05$ , \*\* =  $p < 0.01$ , \*\*\* =  $p < 0.001$ ; repeated-measures Two-Way ANOVA Bonferroni posthoc test for multiple comparisons).

Supplemental Figure 5. **CyTOF gating schemes.** (A) Gating scheme used to identify canonical cell populations for a representative sample. (B) Gating scheme used in viSNE analysis from Supplemental Figure 10 for a representative sample. (C) Representative viSNE plots for each condition colored by overlaid IL-2 expression used for manual screening as described in Supplemental Figure 10A. Red arrows, visual differences from baseline.

Supplemental Figure 6. **CyTOF viSNE analysis identifies significant differences between baseline and 15 h 4°C conditions.** Using viSNE, we clustered cells from all individuals concatenated by condition in an unsupervised manner and then compared gross differences in overlaid marker expression. Unsupervised clustering was used for individual samples and then models were constructed by the algorithm to distinguish baseline and 15 h conditions. Based on trends identified visually from viSNE, we manually gated cell frequencies and median signal intensities for each trend and tested these for statistical significance. (A) viSNE was run on live singlets concatenated by sample group for unstimulated or stimulated samples (10 groups), where each concatenated file was randomly down sampled to 100,000 events. The algorithm was run with 5000 iterations, perplexity 75, theta 0.5, and clustering channels CD16, CD69, TCRgd, CD27, CD154, CD107a, CD45RA, CD38, CD25, CD33, CD14, CD127, CD19, CD4, CD8, CD40, HLA-DR, CD20, CD3, CCR7, CD21, CD56. Trends were identified visually from

viSNE overlay plots (Supplemental Figure 6B-C), gated manually, and tested for statistical significance using raw values (representative example shown). (B) All significant differences identified from visual trends tested. Mean % change was calculated by dividing the latter time point by the prior time point for each respective individual, multiplying by 100, subtracting 100 to get the % change, and then computing the mean of each individual's % change. Statistics: paired two-tailed Student's T-test. \*, largely driven by one outlier with few CD33+ cells at 0 h; mean % change = -33.10 without this individual.

Supplemental Figure 7. **CyTOF CITRUS analysis identifies significant differences between baseline and 15 h 4°C conditions.** Using CITRUS, we conducted supervised comparisons between baseline and 15 h conditions as above, since all viSNE and most other trends were identified between baseline vs. 15 h conditions. Unsupervised clustering was used for individual samples and then models were constructed by the algorithm to distinguish baseline and 15 h conditions. Based on trends identified visually from viSNE and computationally from CITRUS, we manually gated cell frequencies and median signal intensities for each trend and tested these for statistical significance. (A) CITRUS was run on live singlets for each sample. X-Shift/VorTeX was used to determine the optimal cluster number (87), minimum cluster size was set accordingly, and each sample file was randomly down sampled to 10,000 events. The algorithm was used to compare unstimulated or stimulated baseline vs. 15 h conditions using with 5 cross validation folds, 1% false discovery rate, normalized scales, and clustering channels CD16, CD69, TCRgd, CD27, CD154, CD107a, CD45RA, CD38, CD25, CD33, CD14, CD127, CD19, CD4, CD8, CD40, HLA-DR, CD20, CD3, CCR7, CD21, CD56. Trends identified by CITRUS were gated manually and tested for statistical significance using raw values (representative example shown). (B) All significant differences identified from CITRUS trends tested. Mean % change was calculated by dividing the latter time point by the prior time point for



each respective individual, multiplying by 100, subtracting 100 to get the % change, and then computing the mean of each individual's % change. Statistics: paired two-tailed Student's T-test.

Supplemental Figure 8. **Independent analysis of CyTOF data with Astrolabe is consistent with other guided analysis approaches.**

Astrolabe is an independent platform that allows standardized, literature-based analysis of cytometry data, including preprocessing, clustering, cell subset labeling, and differential analysis of sample conditions based on cell subset abundance and marker expression. Raw CyTOF data FCS files were uploaded to the Astrolabe platform for independent analysis to validate findings from previous guided analyses. Astrolabe software performed all data preprocessing, unsupervised clustering (left plot), cell subset labeling, and differential analysis between sample conditions for cell subset abundance and marker expression (center and right plots). For comparisons between five conditions, differentially represented cell subsets were largely consistent with other guided analyses. For example, (A) naive CD8<sup>+</sup> T cell frequency (green dot, center volcano plot) as % of live singlets was decreased in the 15 h 4°C condition for unstimulated samples (right plot), and (B) CD14<sup>+</sup>CD16<sup>-</sup> monocyte frequency (green dot, center volcano plot) as % of live singlets was decreased in the 5 h and 15 h 4°C conditions for stimulated samples (right plot). Statistics: edgeR R package using Astrolabe (see Methods).

**Supplemental Tables:**

**Supplemental Table 1. Kruskal-Wallis test with multiple comparisons across the five delay conditions revealed no statistically significant gene expression difference.**

(See attached cvs spreadsheet)

Kruskal-Wallis test was done for each gene measured across the four groups (A-D; 210 genes total) and p-values were adjusted using the Benjamini-Hochberg method (BH). Genes were considered significant if adjusted p-values were < 0.05.

**Supplemental Table 2. Many of the 284 gated cell parameters were differentially preserved after blood draw.**

| Condition 1   | Condition 2    | Population                            | P-value | Mean change (condition to 2) | % |
|---------------|----------------|---------------------------------------|---------|------------------------------|---|
| 5hr UNSTIM RT | 5hr UNSTIM 4C  | CD45RA+CCR7+ (% of CD8+ T cells)      | 0.0234  | -74.32                       |   |
| 0hr UNSTIM RT | 5hr UNSTIM RT  | Perforin+ (% of CD27+CD20+ B cells)   | 0.0397  | -22.51                       |   |
| 0hr UNSTIM RT | 15hr UNSTIM 4C | Lymphocytes (% of live singlets)      | 0.0008  | 13.50                        |   |
|               |                | CD45RA+CCR7+ (% of CD8+ T cells)      | 0.0365  | -36.45                       |   |
|               |                | Monocytes (% of live singlets)        | 0.0007  | -69.43                       |   |
| 0hr RT STIM   | 15hr 4C STIM   | Lymphocytes (% of live singlets)      | 0.0060  | 9.20                         |   |
|               |                | CD8+ (% of T cells)                   | 0.0462  | -22.24                       |   |
|               |                | CD107a+ (% of CD8+ T cells)           | 0.0002  | 51.24                        |   |
|               |                | IFNg+ (% of CD8+ T cells)             | 0.0130  | 72.83                        |   |
|               |                | MIP1b+ (% of CD8+ T cells)            | 0.0407  | 58.59                        |   |
|               |                | IL2+ (% of CD45RA-CCR7+CD8+ T cells)  | 0.0422  | 78.75                        |   |
|               |                | IL4+ (% of CD45RA-CCR7+CD8+ T cells)  | 0.0472  | 115.02                       |   |
|               |                | TNFa+ (% of CD45RA-CCR7+CD8+ T cells) | 0.0104  | 51.24                        |   |

|  |  |                                      |        |        |
|--|--|--------------------------------------|--------|--------|
|  |  | IL2+ (% of CD45RA+CCR7+CD8+ T cells) | 0.0068 | 86.25  |
|  |  | TNFa+ (% of CD8+ T cells)            | 0.0139 | 72.58  |
|  |  | GMCSF+ (% of NKT cells)              | 0.0371 | 98.13  |
|  |  | IFNg+ (% of CD16lo NK cells)         | 0.0279 | 49.57  |
|  |  | TNFa+ (% of CD16lo NK cells)         | 0.0006 | 69.40  |
|  |  | Monocytes (% of live singlets)       | 0.0223 | -81.08 |

284 cell population frequencies were gated between five conditions for unstimulated and stimulated samples, and significant differences are shown. Each condition was compared to baseline for unstimulated or stimulated samples, and significant differences were identified using raw values. Room temperature was also compared to 4°C for the 5 h conditions. Mean % change was calculated by dividing the latter or colder time point by the prior or room temperature time point for each respective individual, multiplying by 100, subtracting 100 to get the % change, and then computing the mean of each individual's % change. Statistics: paired two-tailed Student's T-test with BH method correction for multiple comparisons.

Supplemental Table 3. **Cytokine-positive cell frequencies for IL2, TNF $\alpha$ , and IFN $\gamma$  are differentially preserved after blood draw.**

| Condition 1 |    | Condition 2  | Population                            | P-value | Mean change % (condition 1 to 2) |
|-------------|----|--------------|---------------------------------------|---------|----------------------------------|
| 5hr STIM    | RT | 5hr 4C STIM  | TNFa+ (% of CD16- monocytes)          | 0.0187  | -41.43                           |
| 0hr STIM    | RT | 5hr 4C STIM  | IFNg+ (% of CD16lo NK cells)          | 0.0320  | 39.34                            |
| 0hr STIM    | RT | 15hr 4C STIM | IFNg+IL2+TNFa+ (% of CD4+ T cells)    | 0.0408  | 113.17                           |
|             |    |              | IFNg+ (% of CD8+ T cells)             | 0.0026  | 72.83                            |
|             |    |              | IL2+ (% of CD8+ T cells)              | 0.0200  | 63.25                            |
|             |    |              | IFNg+ (% of CD45RA-CCR7+CD8+ T cells) | 0.0170  | 40.07                            |
|             |    |              | IL2+ (% of CD45RA-CCR7+CD8+ T cells)  | 0.0084  | 78.75                            |

|  |  |                                                |        |        |
|--|--|------------------------------------------------|--------|--------|
|  |  | TNF $\alpha$ + (% of CD45RA-CCR7+CD8+ T cells) | 0.0021 | 51.24  |
|  |  | IL2+ (% of CD45RA+CCR7+CD8+ T cells)           | 0.0014 | 86.25  |
|  |  | IL2+ (% of CD45RA+CCR7-CD8+ T cells)           | 0.0473 | 102.97 |
|  |  | TNF $\alpha$ + (% of CD45RA+CCR7-CD8+ T cells) | 0.0111 | 19.34  |
|  |  | IL2+ (% of CD45RA-CCR7-CD8+ T cells)           | 0.0128 | 86.82  |
|  |  | TNF $\alpha$ + (% of CD45RA-CCR7-CD8+ T cells) | 0.0113 | 33.70  |
|  |  | TNF $\alpha$ + (% of CD8+ T cells)             | 0.0027 | 72.58  |
|  |  | IFN $\gamma$ + (% of gdT cells)                | 0.0144 | 39.48  |
|  |  | TNF $\alpha$ + (% of gdT cells)                | 0.0478 | 33.33  |
|  |  | IFN $\gamma$ + (% of NKT cells)                | 0.0429 | 46.89  |
|  |  | IL2+ (% of NKT cells)                          | 0.0333 | 136.62 |
|  |  | TNF $\alpha$ + (% of NKT cells)                | 0.0146 | 32.81  |
|  |  | IFN $\gamma$ + (% of CD16lo NK cells)          | 0.0056 | 49.57  |
|  |  | TNF $\alpha$ + (% of CD16lo NK cells)          | 0.0001 | 69.40  |

A total of 64 IL2-, TNF $\alpha$ -, and IFN $\gamma$ -positive frequencies were gated for canonical cytokine-producing cell populations between five conditions for unstimulated and stimulated samples, and significant differences based on raw values are shown. Each condition was compared to baseline for unstimulated or stimulated samples, and significant differences were identified. Room temperature was also compared to 4°C for the 5 h conditions. Mean % change was calculated by dividing the latter or colder time point by the prior or room temperature time point for each respective individual, multiplying by 100, subtracting 100 to get the % change, and then computing the mean of each individual's % change. Statistics: paired two-tailed Student's T-test with BH method correction for multiple comparisons.

Supplementary Table 4. **Several of 365 calculated cell population median signal intensities are differentially preserved after blood draw.**

| Condition 1   | Condition 2    | Median marker (cell population)         | P-value | Mean % change (condition 1 to 2) |
|---------------|----------------|-----------------------------------------|---------|----------------------------------|
| 5hr RT UNSTIM | 5hr 4C UNSTIM  | CD25 (CD45RA-CCR7+CD4+ T cells)         | 0.0401  | -66.70                           |
| 0hr RT UNSTIM | 5hr RT UNSTIM  | Perforin (CD45RA-CCR7+CD4+ T cells)     | 0.0292  | -43.32                           |
| 0hr RT UNSTIM | 15hr 4C UNSTIM | TNF $\alpha$ (CD45RA+CCR7-CD8+ T cells) | 0.0197  | -46.38                           |
|               |                | IL-4 (HLA-DR+CD38+CD8+ T cells)         | 0.0039  | -66.03                           |
|               |                | CTLA-4 (HLA-DR+CD38+CD8+ T cells)       | 0.0070  | -43.29                           |
| 0hr RT STIM   | 15hr 4C STIM   | CTLA-4 (CD45RA-CCR7-CD8+ T cells)       | 0.0353  | -56.51                           |
|               |                | IFN $\gamma$ (NKT cells)                | 0.0134  | 1822.43                          |
|               |                | CD69 (CD27+CD20+ B cells)               | 0.0382  | -56.23                           |
|               |                | CTLA-4 (CD16hi NK cells)                | 0.0161  | -55.70                           |
|               |                | CTLA-4 (CD16lo NK cells)                | 0.0054  | -59.76                           |
|               |                | CTLA-4 (CD16+ monocytes)                | 0.0279  | -53.21                           |

365 cell population median signal intensities were calculated between five conditions for unstimulated and stimulated samples, and significant differences are shown. Each condition was compared to baseline for unstimulated or stimulated samples, and significant differences were identified using raw values. Room temperature was also compared to 4C for the 5 hour conditions. Mean % change was calculated by dividing the latter or colder time point by the prior or room temperature time point for each respective individual, multiplying by 100, subtracting 100 to get the % change, and then computing the mean of each individual's % change. Statistics: paired two-tailed Student's T-test with BH method correction for multiple comparisons.

Supplemental Table 5. **CyTOF analysis of Caspase 3 in canonical cell populations.**

| Condition 1 | Condition 2 | Population | P-value | Mean % change (condition 1 to 2) |
|-------------|-------------|------------|---------|----------------------------------|
|-------------|-------------|------------|---------|----------------------------------|

|               |    |               |    |                                             |        |        |
|---------------|----|---------------|----|---------------------------------------------|--------|--------|
| 0hr<br>UNSTIM | RT | 2hr<br>UNSTIM | RT | Caspase 3+ (% of CD45RA-CCR7- CD4+ T cells) | 0.0262 | -6.60  |
|               |    |               |    | Caspase 3+ (% of CD8+ T cells)              | 0.0226 | -27.62 |
| 0hr<br>UNSTIM | RT | 5hr<br>UNSTIM | RT | Caspase 3+ (% of live singlets)             | 0.0272 | -29.91 |
|               |    |               |    | Caspase 3+ (% of CD4+ T cells)              | 0.0009 | -39.98 |
|               |    |               |    | Caspase 3+ (% of CD45RA-CCR7+ CD4+ T cells) | 0.0031 | -42.09 |
|               |    |               |    | Caspase 3+ (% of CD45RA+CCR7+ CD4+ T cells) | 0.0265 | -41.30 |
|               |    |               |    | Caspase 3+ (% of CD45RA-CCR7- CD4+ T cells) | 0.0358 | -33.18 |
|               |    |               |    | Caspase 3+ (% of CD8+ T cells)              | 0.0051 | -39.93 |
|               |    |               |    | Caspase 3+ (% of CD45RA-CCR7+ CD8+ T cells) | 0.0077 | -43.69 |
|               |    |               |    | Caspase 3+ (% of CD45RA+CCR7+ CD8+ T cells) | 0.0168 | -49.48 |
| 0hr<br>UNSTIM | RT | 5hr<br>UNSTIM | 4C | Caspase 3+ (% of lymphocytes)               | 0.0071 | 1.44   |
|               |    |               |    | Caspase 3+ (% of CD3+ cells)                | 0.0264 | 1.43   |
| 5hr<br>STIM   | RT | 5hr<br>STIM   | 4C | Caspase 3+ (% of lymphocytes)               | 0.0048 | 62.65  |
| 0hr<br>STIM   | RT | 5hr<br>STIM   | RT | Caspase 3+ (% of CD45RA-CCR7+ CD8+ T cells) | 0.0340 | -47.83 |
| 0hr<br>STIM   | RT | 15hr<br>STIM  | 4C | Caspase 3+ (% of CD16lo NK cells)           | 0.0297 | -43.31 |

Caspase 3-positive frequencies were gated for 26 canonical cell populations between five conditions for unstimulated and stimulated samples, and significant differences based on raw values are shown. Each condition was compared to baseline for unstimulated or stimulated samples, and significant differences were identified. Room temperature was also compared to 4°C for the 5 h conditions. Mean % change was calculated by dividing the latter or colder time point by the prior or room temperature time point for each respective individual, multiplying by 100, subtracting 100 to get the % change, and then computing the mean of each individual's % change. Statistics: paired two-tailed Student's T-test with BH method correction for multiple comparisons.

**Supplemental Table 6. CyTOF antibody panel.**

| <b>Metal</b> | <b>Marker</b>       | <b>Staining</b>    | <b>Clone</b> | <b>Source</b>                | <b>Catalog No.</b> |
|--------------|---------------------|--------------------|--------------|------------------------------|--------------------|
| 113In        | CD57                | Surface            | HCD57        | BioLegend/Stanford HIMC      | Custom             |
| 115In        | Live/dead           | Intracell          | n/a          | Stanford HIMC                | n/a                |
| 140Ce        | Beads               | n/a                | n/a          | Fluidigm                     | 201078             |
| 141Pr        | CD25                | Surface            | 3C7          | BioLegend/Stanford HIMC      | 10193              |
| 142Nd        | CD19                | Surface            | H1B19        | Fluidigm                     | 3142001B           |
| 143Nd        | IL-10               | Intracell          | JES3-9D7     | BioLegend/Stanford HIMC      | 501423             |
| 144Nd        | IL-4                | Intracell          | MP4-25D2     | Fluidigm                     | 3144010B           |
| 145Nd        | CD4                 | Surface            | RPA-T4       | Fluidigm                     | 3145001B           |
| 146Nd        | CD8                 | Surface            | RPA-T8       | Fluidigm                     | 3146001B           |
| 147Sm        | CD20                | Surface            | 2H7          | Fluidigm                     | 3147001B           |
| 148Nd        | CD40                | Surface            | 5C3          | BioLegend/Stanford HIMC      | 334325             |
| 149Sm        | CTLA-4              | Surface            | 14D3         | eBioscience/Stanford HIMC    | 14-1529-82         |
| 150Nd        | MIP1b               | Intracell          | D21-1351     | Fluidigm                     | 3150004B           |
| 151Eu        | CD107a              | Surface*           | H4A3         | Fluidigm                     | 3151002B           |
| 152Sm        | TNF $\alpha$        | Intracell          | Mab11        | Fluidigm                     | 3152002B           |
| 153Eu        | CD45RA              | Surface            | HI100        | Fluidigm                     | 3153001B           |
| 154Sm        | CD3                 | Surface            | UCHT1        | Fluidigm                     | 3154003B           |
| 155Gd        | CD36                | Surface            | 5-271        | Fluidigm                     | 3155012B           |
| 156Gd        | CD38                | Surface            | HB-7         | BD Biosciences/Stanford HIMC | 347680             |
| 157Gd        | HLA-DR              | Surface            | G46-6        | BD Biosciences/Stanford HIMC | 556642             |
| 158Gd        | CD33                | Surface            | WM53         | Fluidigm                     | 3158001B           |
| 159Tb        | GMCSF               | Intracell          | BVD2-21C11   | Fluidigm                     | 3159008B           |
| 160Gd        | CD14                | Surface            | M5E2         | Fluidigm                     | 3160001B           |
| 161Dy        | IFN $\gamma$        | Intracell          | 4S.B3        | eBioscience/Stanford HIMC    | 554549             |
| 162Dy        | CD69                | Surface            | MCA 1442     | Fluidigm                     | Custom             |
| 163Dy        | TCR $\gamma\delta$  | Surface            | B1           | BioLegend/Stanford HIMC      | 331202             |
| 164Dy        | IL-17               | Intracell          | N49-853      | Fluidigm                     | 3164002B           |
| 165Ho        | CD127               | Surface            | A019D5       | Fluidigm                     | 3165008B           |
| 166Er        | IL-2                | Intracell          | MQ1-17h12    | Fluidigm                     | 3166002B           |
| 167Er        | CD27                | Surface            | L128         | Fluidigm                     | 3167006B           |
| 168Er        | CD154(CD40L)        | Surface*/Intracell | 24-31        | Fluidigm                     | 3168006B           |
| 169Tm        | CCR7                | Surface            | 150503       | R&D Systems/Stanford HIMC    | MAB197-100         |
| 170Er        | PD1                 | Surface            | EH12.1       | BD Biosciences/Stanford HIMC | 562138             |
| 171Yb        | Granzyme B          | Intracell          | GB11         | Fluidigm                     | 3171002B           |
| 172Yb        | Caspase-3 (cleaved) | Intracell          | 5A1E         | Fluidigm                     | 3172023A           |
| 173Yb        | Perforin            | Intracell          | B-D48        | Abcam/Stanford HIMC          | ab47225            |
| 174Yb        | CD21                | Surface            | Bu32         | BioLegend/Stanford HIMC      | 354902             |
| 175Lu        | PD-L1               | Surface            | 29E.2A3      | Fluidigm                     | 3175017B           |
| 176Yb        | CD56                | Surface            | NCAM16.2     | Fluidigm                     | 3176008B           |

|       |      |           |     |          |          |
|-------|------|-----------|-----|----------|----------|
| 209Bi | CD16 | Surface   | 3G8 | Fluidigm | 3209002B |
| 191Ir | DNA  | Intracell | n/a | Fluidigm | 201192B  |
| 193Ir | DNA  | Intracell | n/a | Fluidigm | 201192B  |

---

\* Added during stimulation.
